# Supplementary material
Source: Copernicus journal article supplement (doi:10.5194/acp-26-9471-2026)
Supplement: Supplementary file 1 [file acp-26-9471-2026-supplement.pdf]

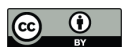

*Supplement of*

## **Intended and unintended consequences of atmospheric methane oxidation enhancement**

**Hannah M. Horowitz**

*Correspondence to:* Hannah M. Horowitz (hmhorow@illinois.edu)

The copyright of individual parts of the supplement might differ from the article licence.

The Supplemental information contains the following: Figures S1-S6; Tables S1-S7; Section S1 (following Table S2)

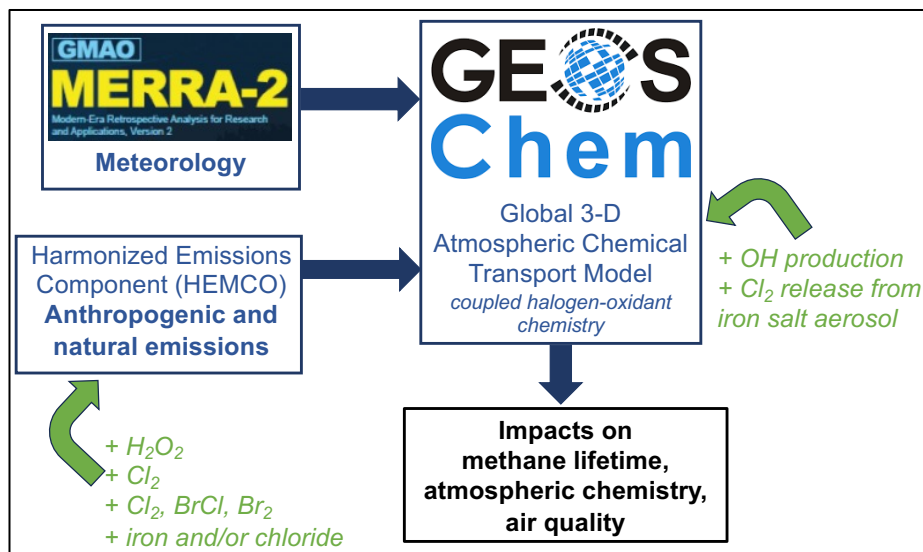

**Figure S1.** Methodology Schematic. The GEOS-Chem logo is provided for download at <https://geoschem.github.io/logo.html> (copyright © the International GEOS-Chem Community). The MERRA-2 logo was created by NASA's Global Modeling and

5 Assimilation Office (GMAO) at NASA Goddard Space Flight Center (<https://gmao.gsfc.nasa.gov/gmao-products/merra-2/>).

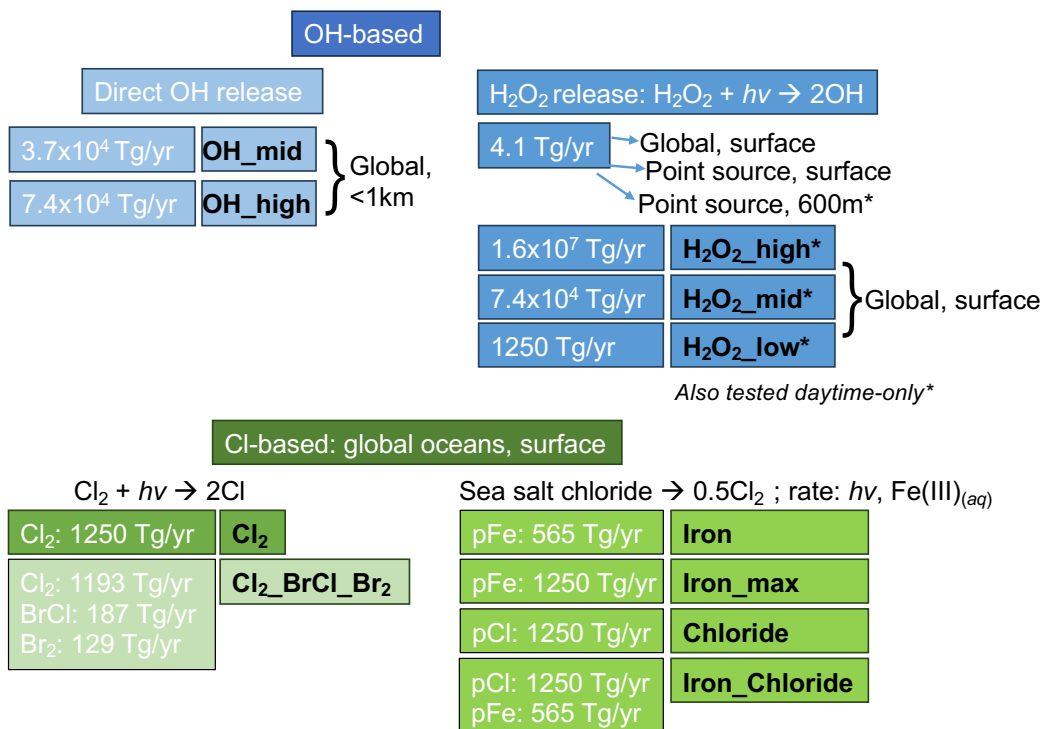

**Figure S2.** All model experiments conducted in the current study, grouped by methane oxidation mechanism and emitted species. pFe refers to particulate iron and pCl particulate accumulation-mode chloride.

- S1. Additional details on calculations in the Chen et al. (2024) parameterization.** Reaction rates given in the Wittmer et al. (2015b) Table 2 range from  $6.6 - 8.7 \times 10^{21}$  atoms  $\text{cm}^{-2}\text{hr}^{-1}$  for artificial seawater and  $8.7 - 13 \times 10^{21}$  atoms  $\text{cm}^{-2} \text{hr}^{-1}$  for NaCl solution. Dividing by a factor of 3600 s/hr, the reaction rates are  $1.8 - 2.4 \times 10^{18}$  atoms  $\text{cm}^{-2}\text{s}^{-1}$  for artificial seawater and  $2.4 - 3.6 \times 10^{18}$  atoms  $\text{cm}^{-2}\text{s}^{-1}$  for NaCl solution. Wittmer et al. (2015b) summarized the rate as  $\sim 1.9 \times 10^{18}$  atoms  $\text{cm}^{-2}\text{s}^{-1}$  in the Abstract and Conclusions for a ratio of  $\text{Cl}^-/\text{Fe}^{3+} = 13$ . In Chen et al. (2024), from personal communication with Dr. Cornelius Zetzsch, this rate is incorrect as it was not adjusted for the volume of the chamber (requires dividing by the chamber size,  $3.65 \times 10^6$ ). After the correction, the rate is reduced to  $5.2 \times 10^{11}$  atoms  $\text{cm}^{-2}\text{s}^{-1}$  (as used in Chen et al., 2024).
- 20 The value of  $\alpha$  (see Table 1 and Section 2.2.2.3) can be calculated from the reaction rates and aerosol surface areas provided in Wittmer et al. (2015b) (See Table S3 below). Across this range of  $\text{Cl}^-/\text{Fe}^{3+}$  and aerosol surface areas, the values calculated for  $\alpha$  are within 14%. Chen et al. (2024) uses the value of  $\alpha$  calculated from the summary rate and  $\text{Cl}^-/\text{Fe}^{3+}$  ratio reported in the Abstract of Wittmer et al. (2015) rounded to two significant figures ( $\alpha = 1.4 \times 10^5 \mu\text{m}^{-2} \text{M}^{-2}$ ).

25 **Table S1** Summary of Chen et al. (2024) parameter calculations from values in Wittmer et al. (2015b) and personal communication with Dr. Cornelius Zetzsch.

| $\text{Cl}^-/\text{Fe}^{3+}$ | Reported rate<br>(atoms $\text{cm}^{-2}\text{s}^{-1}$ ) | Corrected rate<br>(atoms $\text{cm}^{-2}\text{s}^{-1}$ ) | Aerosol surface area<br>concentration ( $\mu\text{m}^2/\text{cm}^3$ ) | Calculated $\alpha$<br>( $\mu\text{m}^{-2} \text{M}^{-2}$ ) |
|------------------------------|---------------------------------------------------------|----------------------------------------------------------|-----------------------------------------------------------------------|-------------------------------------------------------------|
| 13                           | $1.9 \times 10^{18}$                                    | $5.2 \times 10^{11}$                                     | 30000                                                                 | $1.36 \times 10^5$                                          |
| 101                          | $2.8 \times 10^{17}$                                    | $7.7 \times 10^{10}$                                     | 18000                                                                 | $1.55 \times 10^5$                                          |

**Table S2** Comparison of Q. Li et al. (2023) and the Current Study Relevant to the Cl<sub>2</sub> and Cl<sub>2</sub>\_BrCl\_Br<sub>2</sub> Scenarios

|                         | Q. Li et al. (2023)                                                                                                                                                                                                                                                                                   | This Study                                                                                                                                                                                                                                                                                                                    |
|-------------------------|-------------------------------------------------------------------------------------------------------------------------------------------------------------------------------------------------------------------------------------------------------------------------------------------------------|-------------------------------------------------------------------------------------------------------------------------------------------------------------------------------------------------------------------------------------------------------------------------------------------------------------------------------|
| Model                   | CAM4-Chem-CESM-1.1                                                                                                                                                                                                                                                                                    | GEOS-Chem 13.2.1                                                                                                                                                                                                                                                                                                              |
| Model run time          | 2020–2050                                                                                                                                                                                                                                                                                             | 2019                                                                                                                                                                                                                                                                                                                          |
| Anthropogenic emissions | Representative concentration pathway 8.5 time-varying                                                                                                                                                                                                                                                 | CEDS CMIP6, year 2019                                                                                                                                                                                                                                                                                                         |
| Halogen chemistry       | Li et al. (2022); includes Saiz-Lopez et al. (2014) and Ordóñez et al. (2012) plus chlorine and bromine release from sea salt+N <sub>2</sub> O <sub>5</sub> (also in GEOS-Chem), sea salt+HNO <sub>3</sub> (not in GEOS-Chem), and N <sub>2</sub> O <sub>5</sub> +HCl based on Hossaini et al. (2016) | Wang et al. (2021); includes Wang et al. (2019), Sherwen, Evans, et al. (2016), Sherwen, Schmidt, et al. (2016), and Zhu et al. (2019), plus sulfate formation from HOBr and HOCl, N <sub>2</sub> O <sub>5</sub> +Cl <sup>-</sup> from Wang et al. (2020), improved reactive uptake coefficients on ice crystals for halogens |
| Model resolution        | 1.9° × 2.5° horizontal                                                                                                                                                                                                                                                                                | 4° × 5° horizontal                                                                                                                                                                                                                                                                                                            |
| Model resolution        | 26 vertical levels up to 40 km                                                                                                                                                                                                                                                                        | 72 vertical layers up to 80 km; chemistry performed in first 59 layers up to 49.8 km                                                                                                                                                                                                                                          |

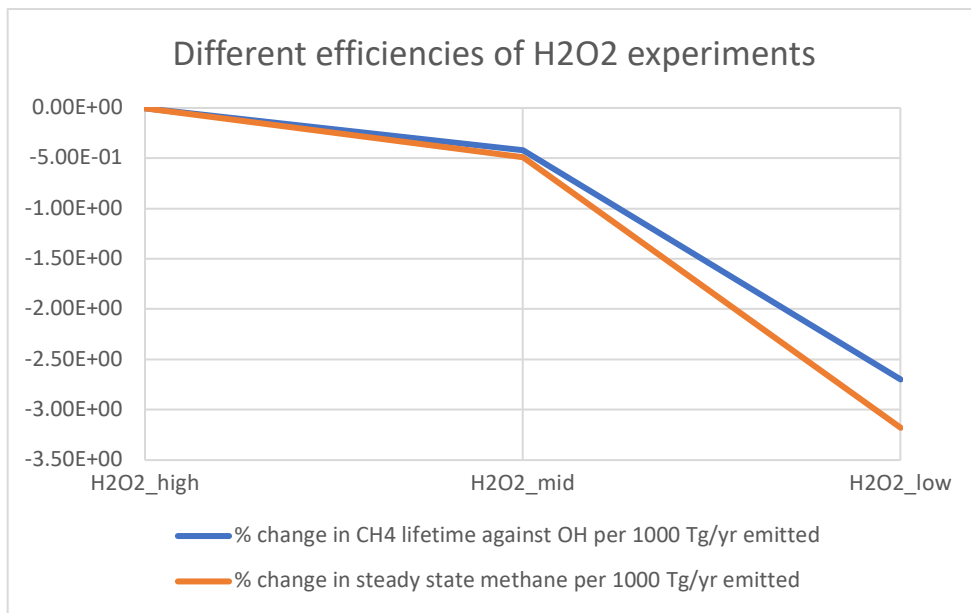

**Figure S3** Normalized percent change in methane lifetime against oxidation by tropospheric OH (blue line) and change in steady-state methane concentration (orange line) per 1000 Tg/yr of H<sub>2</sub>O<sub>2</sub> emissions across the three experiments detailed in Table 1.

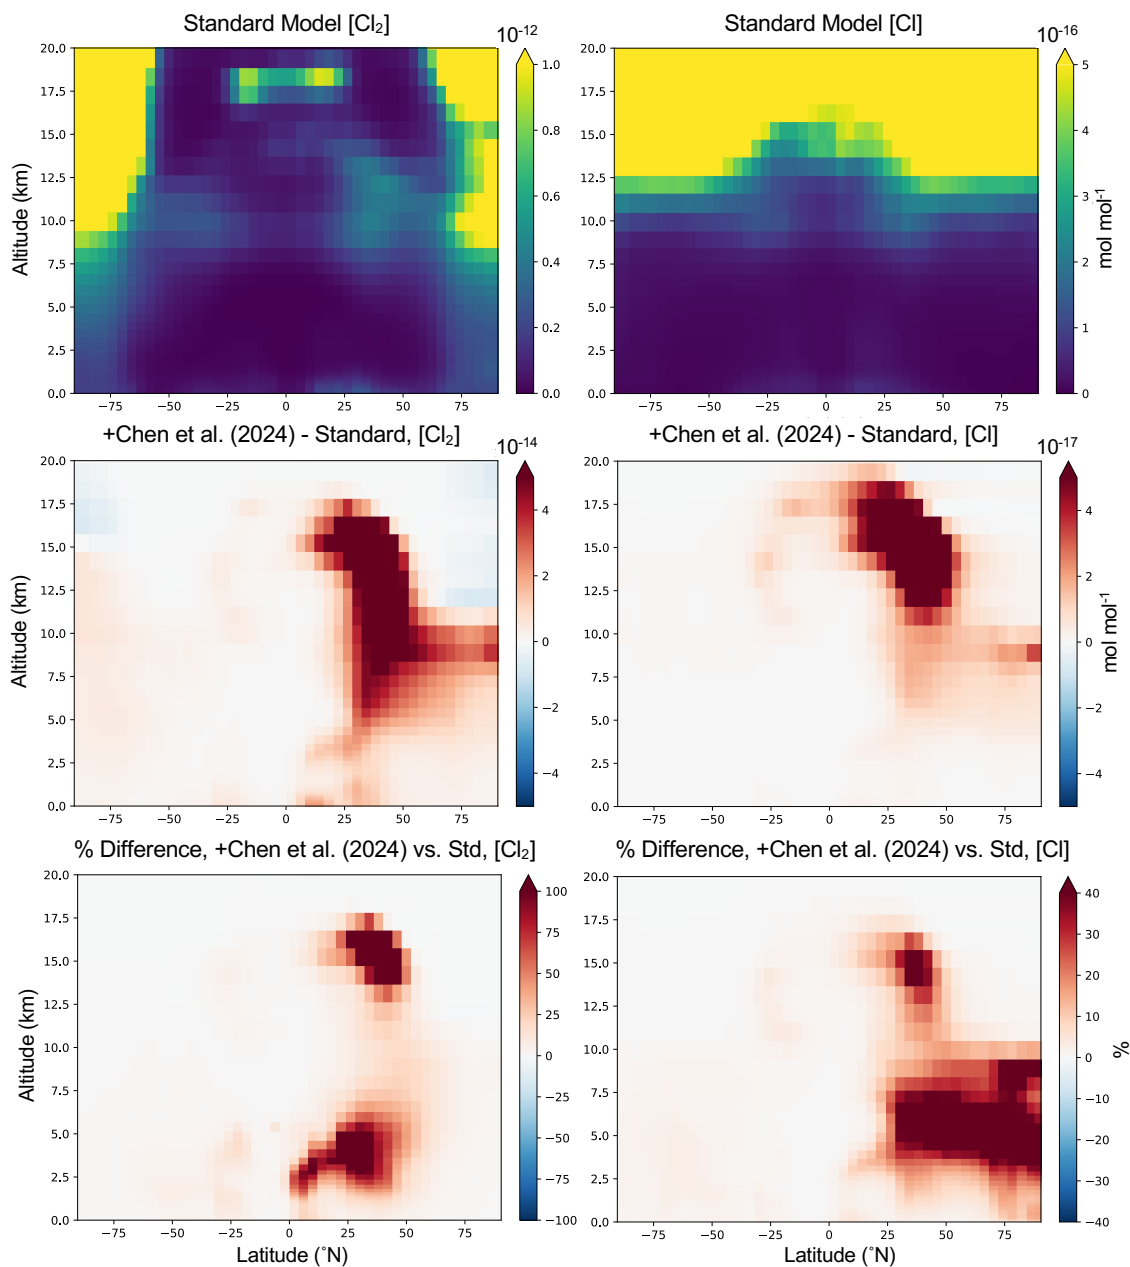

35

**Figure S4:** Impacts of adding natural  $\text{Cl}_2$  emissions from the Chen et al. (2024) parameterization on simulated year 2019 zonal, annual mean concentrations of  $\text{Cl}_2$  (left panels) and  $\text{Cl}$  (right panels) up to 20km altitude. The top row is the standard model concentrations ( $\text{mol mol}^{-1}$ ), with the second and third rows containing the absolute difference in  $\text{mol mol}^{-1}$  and relative difference in percent, respectively, from adding the Chen et al. (2024) mechanism.

40

**Table S3** Comparison of van Herpen et al. (2023) and Current Study for Iron and Chloride Scenarios

|                                         | van Herpen et al. (2023)                                                                     | This Study                                                                                |
|-----------------------------------------|----------------------------------------------------------------------------------------------|-------------------------------------------------------------------------------------------|
| Model                                   | CAM4-Chem                                                                                    | GEOS-Chem 13.2.1                                                                          |
| Model run time                          | June 1996–1998                                                                               | 2019                                                                                      |
| Aerosols participating                  | Dust 1–2.5 $\mu\text{m}$                                                                     | Dust 0.1–1 $\mu\text{m}$ ; Accumulation mode sea salt chloride ( $\leq 0.5 \mu\text{m}$ ) |
| Dust iron content                       | 3.5%                                                                                         | 3.5%                                                                                      |
| Photoactive iron                        | Dust: 1.8%                                                                                   | Dust: 2.68%<br>Anthropogenic*: 26.8%                                                      |
| Reaction rate for $\text{Cl}_2$ release | Fe(II)–Fe(III) cycling kinetics from Zhu et al. (1993) (calculations based on field samples) | Based on Wittmer, Bleicher, and Zetzsch (2015) chamber study (Chen et al., 2024)          |
| Halogen chemistry                       | Wang et al. (2021)                                                                           | Wang et al. (2021)                                                                        |
| Horizontal resolution                   | model<br>$0.9^\circ \times 1.25^\circ$                                                       | $4^\circ \times 5^\circ$                                                                  |
| Vertical resolution                     | model<br>56 vertical levels up to 40 km                                                      | 72 vertical levels up to 80 km; chemistry performed in first 59 layers up to 49.8 km      |

*\*this includes pFe emitted in the Iron and Iron\_Chloride AOE experiments*

**Table S4** Selected reactions involving chlorine, bromine, and OH.

|                                                                     |                                                                 | <b>Reaction rate (gas-phase) or reactive uptake coefficient <math>\gamma</math> (heterogeneous)</b> | <b>GEOS-Chem reference</b>                   |
|---------------------------------------------------------------------|-----------------------------------------------------------------|-----------------------------------------------------------------------------------------------------|----------------------------------------------|
| <b><i>OH reactions directly producing Cl and Cl<sub>2</sub></i></b> |                                                                 |                                                                                                     |                                              |
| $\dagger\text{OH} + \text{Cl}^\cdot$                                | $\rightarrow 0.5\text{Cl}_2 + \text{OH}^\cdot$                  | $\gamma = 0.04[\text{Cl}^\cdot]$                                                                    | Wang et al. (2019)                           |
| $\dagger\text{OH} + \text{CH}_3\text{Cl}$                           | $\rightarrow \text{Cl} + \text{HO}_2 + \text{H}_2\text{O}$      | $1.96\text{E-}12\text{exp}(-1200/\text{T})$                                                         | Eastham et al. (2014); updated to JPL 15-10  |
| $\dagger\text{OH} + \text{CH}_2\text{Cl}_2$                         | $\rightarrow 2\text{Cl} + \text{HO}_2$                          | $2.61\text{E-}12\text{exp}(-944/\text{T})$                                                          | Sherwen et al. (2016)                        |
| $\dagger\text{OH} + \text{CHCl}_3$                                  | $\rightarrow 3\text{Cl} + \text{HO}_2$                          | $4.69\text{E-}12\text{exp}(-1134)$                                                                  | Sherwen et al. (2016)                        |
| $\dagger\text{OH} + \text{CH}_3\text{CCl}_3$                        | $\rightarrow 3\text{Cl} + \text{H}_2\text{O}$                   | $1.64\text{E-}12\text{exp}(-1520/\text{T})$                                                         | Eastham et al. (2014)                        |
| $\text{OH} + \text{HCFC}_s$                                         | $\rightarrow \text{XCl} + \text{H}_2\text{O}^*$                 | Varies                                                                                              | Eastham et al. (2014); updated to JPL 15-10  |
| <b><i>Chlorine reactions producing CO</i></b>                       |                                                                 |                                                                                                     |                                              |
| $\text{CH}_2\text{O} + \text{Cl}$                                   | $\rightarrow \text{CO} + \text{HCl} + \text{HO}_2$              | $8.1\text{E-}11\text{exp}(-30/\text{T})$                                                            | Sherwen et al. (2016)                        |
| $\text{CH}_3\text{Cl} + \text{Cl}$                                  | $\rightarrow \text{CO} + 2\text{HCl} + \text{HO}_2$             | $2.17\text{E-}11\text{exp}(-1130/\text{T})$                                                         | Eastham et al. (2014); Sherwen et al. (2016) |
| $\text{CH}_2\text{Cl}_2 + \text{Cl}$                                | $\rightarrow \text{CO} + \text{HCl} + 2\text{Cl} + \text{HO}_2$ | $1.24\text{E-}12\text{exp}(-1070/\text{T})$                                                         | Sherwen et al. (2016)                        |
| $\text{CHCl}_3 + \text{Cl}$                                         | $\rightarrow \text{CO} + \text{HCl} + 3\text{Cl} + \text{HO}_2$ | $3.77\text{E-}12\text{exp}(-1011/\text{T})$                                                         | Sherwen et al. (2016)                        |
| <b><i>Methane oxidation reactions</i></b>                           |                                                                 |                                                                                                     |                                              |
| $\text{CH}_4 + \text{OH}$                                           | $\rightarrow \text{CH}_3\text{O}_2 + \text{H}_2\text{O}$        | $2.45\text{E-}12\text{exp}(-1775/\text{T})$                                                         | JPL 15-10                                    |
| $\text{CH}_4 + \text{Cl}$                                           | $\rightarrow \text{CH}_3\text{O}_2 + \text{HCl}$                | $7.10\text{E-}12\text{exp}(-1270/\text{T})$                                                         | JPL 15-10                                    |

$\dagger$ These reactions have an analogous equivalent involving bromine

\* $X = 1$  for HCFC22 and HCFC142b;  $X = 2$  for HCFC141b and HCFC123.

45

**Table S5** Comparison of changes in tropospheric-wide Cl<sub>2</sub> and Cl burdens. Note: Percent change in annual mean tropospheric burdens for model experiments given in parentheses are relative to the standard version (\* = relative to standard + Chen et al., 2024).

|                | Cl <sub>2</sub><br>(Gg) | $\Delta\text{Cl}_2$ (%) | Cl (kg) | $\Delta\text{Cl}$ (%) | $\Delta\text{Cl}_2/\Delta\text{Cl}$<br>ratio |
|----------------|-------------------------|-------------------------|---------|-----------------------|----------------------------------------------|
| Standard       | 1.06                    | --                      | 313     | --                    | --                                           |
| Cl2            | 926.7                   | 87369.7%                | 7250    | 2213.6%               | 39.5                                         |
| Cl2_BrCl_Br2   | 829.7                   | 78216.5%                | 6171    | 1869.5%               | 41.8                                         |
| Standard+Chen  | 1.16                    | 9.8%                    | 343     | 9.4%                  | 1.0                                          |
| Iron*          | 14.04                   | 1107.6%                 | 924     | 169.4%                | 6.5                                          |
| Chloride*      | 3.99                    | 243.2%                  | 955     | 178.6%                | 1.4                                          |
| Iron_Chloride* | 34.30                   | 2849.4%                 | 2599    | 658.0%                | 4.3                                          |

50

**Table S6** Percent Changes in Tropospheric Burdens for the OH Experiments

|          | Br <sub>y</sub> | Cl <sub>y</sub> | I <sub>y</sub> | O <sub>3</sub> | OH     | Cl     | NO <sub>x</sub> | CO     |
|----------|-----------------|-----------------|----------------|----------------|--------|--------|-----------------|--------|
| Standard | 20 Gg           | 241 Gg          | 12 Gg          | 338 Tg         | 215 Mg | 318 kg | 359 Gg          | 349 Tg |
| OH_mid   | 41.2%           | 11.6%           | -17.8%         | -10.4%         | 50.8%  | 45.2%  | -21.1%          | -26.4% |
| OH_high  | 54.6%           | 19.5%           | -28.3%         | -14.3%         | 94%    | 72.3%  | -24.7%          | -31.1% |

55 **TABLE S7** Percent Change in Tropospheric Burdens of Other Climate Forcers and Ozone-Depleting Substances, with Cl Atom Included for Reference, for Experiments Described in Table 1

|                                       | HCFC-123 (%) | Total inorganic aerosol (%) | Dibromo-methane (CH <sub>2</sub> Br <sub>2</sub> ) (%) | Bromoform (CHBr <sub>3</sub> ) (%) | Methyl iodide (CH <sub>3</sub> I) (%) | Cl (%) | Ozone (%) |
|---------------------------------------|--------------|-----------------------------|--------------------------------------------------------|------------------------------------|---------------------------------------|--------|-----------|
| H2O2_high                             | -74.2        | 10.1                        | -59.5                                                  | -39.4                              | -6.6                                  | 401.7  | -38.5     |
| H2O2_mid                              | -34.8        | 12.6                        | -30.9                                                  | -20.9                              | -3.0                                  | 73.8   | -6.0      |
| H2O2_low                              | -3.9         | 6.4                         | -3.9                                                   | -2.6                               | -0.4                                  | 6.3    | -0.7      |
| Cl <sub>2</sub>                       | 30.7         | 6.7                         | 35.5                                                   | 10.8                               | -1.1                                  | 2213.6 | -24.4     |
| Cl <sub>2</sub> _BrCl_Br <sub>2</sub> | 62.6         | 20.2                        | 80.5                                                   | 11.9                               | -7.8                                  | 1869.5 | -67.1     |
| Iron                                  | 2.6          | 9.1                         | 2.7                                                    | 1.0                                | -0.2                                  | 169.4  | -3.4      |
| Chloride                              | 5.4          | -0.6                        | 5.6                                                    | 2.3                                | -0.2                                  | 178.6  | -5.6      |
| Iron_Chloride                         | 10.9         | 10.1                        | 11.7                                                   | 4.4                                | -0.5                                  | 658.0  | -10.6     |

60

65

70

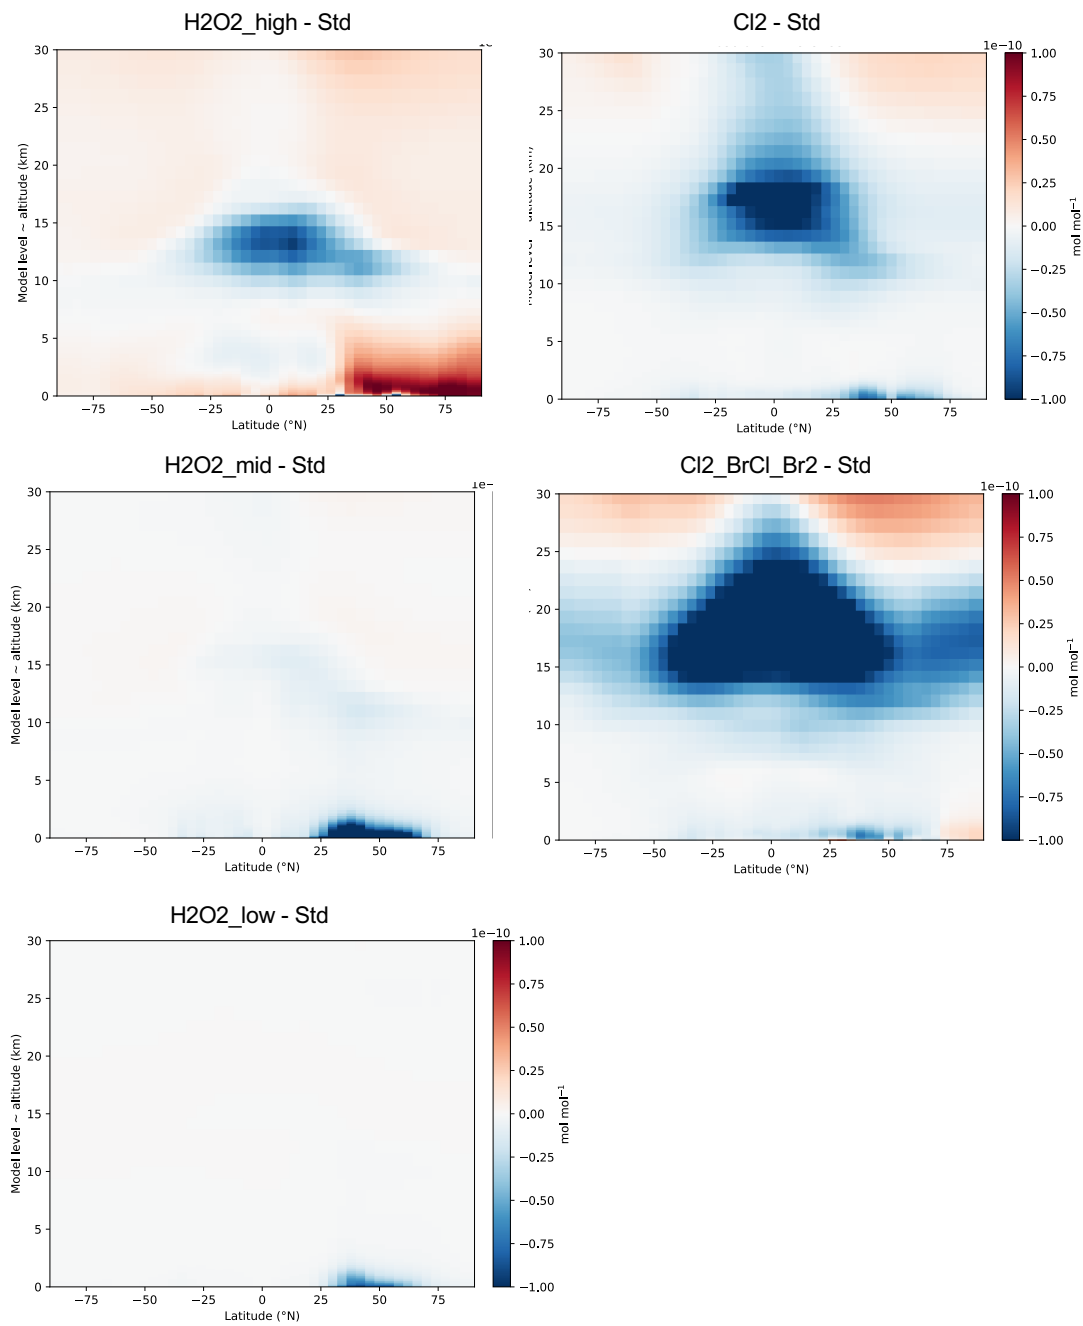

**Figure S5** Zonal mean absolute changes in  $\text{NO}_x$  across the scenarios in  $\text{mol/mol}$ .

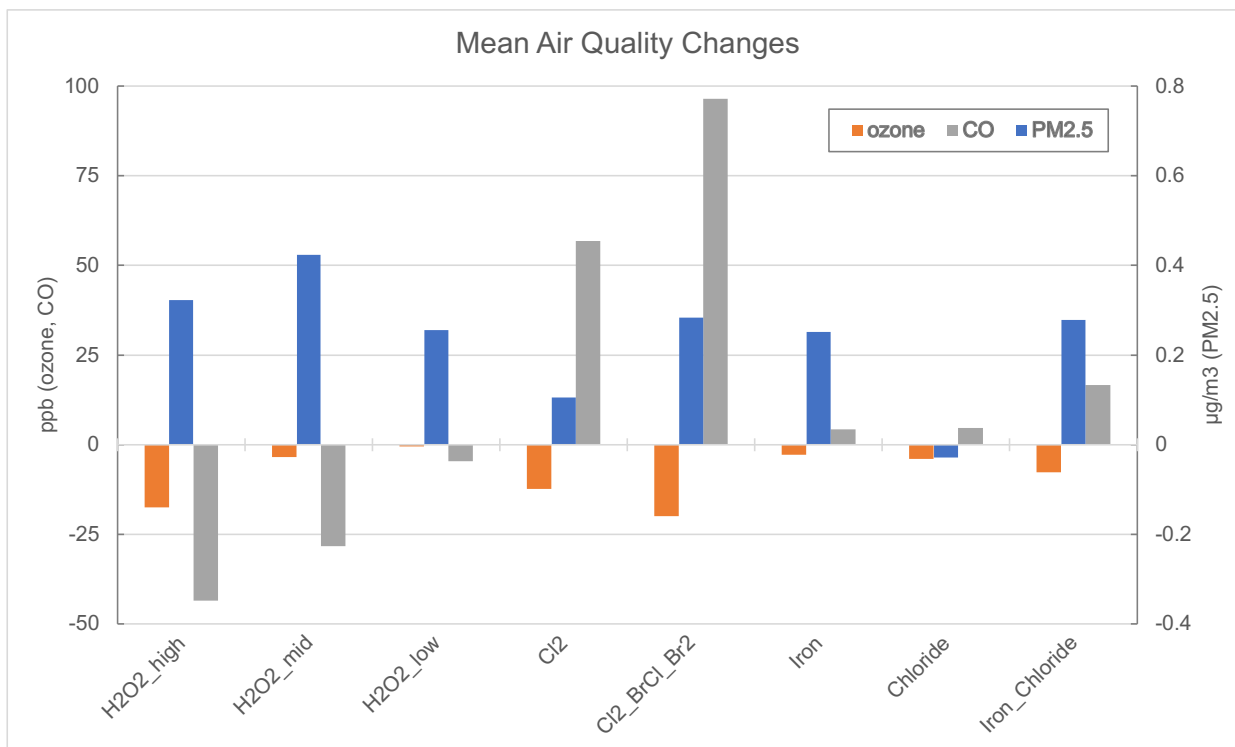

**Figure S6** Changes in global annual mean ozone (orange), CO (gray) (left axis), and PM<sub>2.5</sub> (blue, right axis) concentrations across the experiments.

## Additional References

- Li, Q., Fernandez, R. P., Hossaini, R., Iglesias-Suarez, F., Cuevas, C. A., Apel, E. C., Kinnison, D. E., Lamarque, J.-F., and Saiz-Lopez, A.: Reactive halogens increase the global methane lifetime and radiative forcing in the 21st century, *Nat. Commun.*, 13, 2768, <https://doi.org/10.1038/s41467-022-30456-8>, 2022.
- 85 Ordóñez, C., Lamarque, J.-F., Tilmes, S., Kinnison, D. E., Atlas, E. L., Blake, D. R., Sousa Santos, G., Brasseur, G., and Saiz-Lopez, A.: Bromine and iodine chemistry in a global chemistry-climate model: description and evaluation of very short-lived oceanic sources, *Atmos. Chem. Phys.*, 12, 1423–105 1447, <https://doi.org/10.5194/acp-12-1423-2012>, 2012.
- Saiz-Lopez, A., Fernandez, R. P., Ordóñez, C., Kinnison, D. E., Gómez Martín, J. C., Lamarque, J.-F., and Tilmes, S.: Iodine chemistry in the troposphere and its effect on ozone, *Atmos. Chem. Phys.*, 14, 13119–13143, <https://doi.org/10.5194/acp-14-13119-2014>, 2014.
- 90 Sherwen, T., Evans, M. J., Carpenter, L. J., Andrews, S. J., Lidster, R. T., Dix, B., Koenig, T. K., Sinreich, R., Ortega, I., Volkamer, R., Saiz-Lopez, A., Prados-Roman, C., Mahajan, A. S., and Ordóñez, C.: Iodine’s impact on tropospheric oxidants: a global model study in GEOS-Chem, *Atmos. Chem. Phys.*, 16, 1161–1186, <https://doi.org/10.5194/acp-16-1161-2016>, 2016a.
- 95 Wang, X., Jacob, D. J., Fu, X., Wang, T., Breton, M. L., Hallquist, M., Liu, Z., McDuffie, E. E., and Liao, H.: Effects of anthropogenic chlorine on PM<sub>2.5</sub> and ozone air quality in China, *Environ. Sci. Technol.*, 54, 9908–9916, <https://doi.org/10.1021/acs.est.0c02296>, 2020.
- Zhu, L., Jacob, D. J., Eastham, S. D., Sulprizio, M. P., Wang, X., Sherwen, T., Evans, M. J., Chen, Q., Alexander, B., Koenig, T. K., Volkamer, R., Huey, L. G., Le Breton, M., Bannan, T. J., and Percival, C. J.: Effect of sea salt aerosol on tropospheric bromine chemistry, *Atmos. Chem. Phys.*, 19, 6497–6507, <https://doi.org/10.5194/acp-19-6497-2019>, 2019.
- 100
